# Supplementary material for: A MADS-box gene NtSVP regulates pedicel elongation by directly suppressing a KNAT1-like KNOX gene NtBPL in tobacco (Nicotiana tabacum L.)
Source: PubMed Central journal article supplement (PMC4588881; doi:10.1093/jxb/erv332), 2015-07-14
Supplement: supp_erv332_jexbot151217_file001.pdf [file supp_erv332_jexbot151217_file001.pdf]

**A MADS-box gene *NtSVP* regulates pedicel elongation by directly suppressing a *KNAT1*-like KNOX gene *NtBPL* in tobacco (*Nicotiana tabacum* L.)**

**Di Wang<sup>1,\*</sup>, Xiaobo Chen<sup>1,\*</sup>, Zenglin Zhang<sup>2</sup>, Danmei Liu<sup>3</sup>, Gaoyuan Song<sup>1</sup>, Xingchen Kong<sup>1</sup>, Shuaifeng Geng<sup>1</sup>, Jiayue Yang<sup>1</sup>, Bingnan Wang<sup>1</sup>, Liang Wu<sup>1</sup>, Aili Li<sup>1</sup>, and Long Mao<sup>1,\*\*</sup>**

<sup>1</sup> National Key Facility for Crop Gene Resources and Genetic Improvement (NFCRI), MOA Key Laboratory of Crop Germplasm and Biotechnology, Institute of Crop Science, Chinese Academy of Agricultural Sciences (CAAS), Beijing 100081, China

<sup>2</sup> Key Laboratory for Tobacco Gene Resources, Tobacco Research Institute, Chinese Academy of Agricultural Sciences, Qingdao 266101, China

<sup>3</sup> School of Life Science, Shanxi University, Taiyuan 030006, China

\*These authors contributed equally to this work.

\*\*For correspondence: maolong@caas.cn

## Supplementary figure legends

### Supplementary Fig. S1. Protein sequence analysis and tissue-specific expression of *NtSVP*.

(A) Alignment of SVP-like protein sequences. The MADS-box, I domain, K domain and C-terminal domain are marked. Amino acids in black shading and grey shading indicate identical or similar amino acids among the proteins.

(B) An unrooted phylogenetic tree of SVP-clade MADS-box proteins from some species. The scale indicates branch lengths. Accession numbers are as follows: OsMADS22 (Os02g0761000), OsMADS47 (Os03g0186600), OsMADS55 (Os06g0217300), HvBM1 (AJ249142), HvBM10 (EF043040), Brassica campestris (Chinese cabbage) BcSVP (DQ922945), and CaSVP (AFI49342), Eucalyptus grandis EgrSVP (AY263809), NtSTMADS11 (mRNA\_51421 in SOL Genomics Network), INCO (CAG27846), JOINTLESS (Solyc11g010570), SVP (At2g22540), AGL24 (At4g24540), Ta-VRT2(DQ022679), SOC1 (At2g45660).

(C) Tissue-specific expression of *NtSVP* in wild-type plants.

### Supplementary Fig. S2. Phenotypes of the *NtSVP* transgenic plants.

(A) DNA fragment used for *NtSVP*-RNAi construct.

(B) The morphology of abscission zones in wild-type and *NtSVP*-RNAi transgenic tobacco indicated by white arrows.

(C) The morphology of flower and pedicel in the five developmental stages as described (Zhu *et al.*, 2013).

(D) Quantitative measurement of the pedicel lengths of the WT and two *NtSVP*-RNAi lines from S1 to S5 (N = 10 X 5, 50 pedicels from five individual plants per genotype). Values are means  $\pm$  SE.

(E) The whole plant morphology of wild-type and *NtSVP* transgenic plants at the reproductive stage.

(F) Quantitative measurement of plant height of WT, *NtSVP*-RNAi and *NtSVP*-OE plants at anthesis stage. (N=5, 5 plants for each genotype). Values are means  $\pm$  SE.

### Supplementary Fig. S3. Protein sequence analysis and tissue-specific expression of *NtBPL*.

(A) Alignment of the NtBPL protein sequence with its homologs in tobacco, tomato and Arabidopsis. KNOX I and KNOX II subdomain, ELK domain, homeobox domain are marked. Amino acids in black shading and grey shading indicate identical or similar amino acids among the proteins.

(B) An unrooted phylogenetic tree of KNOX proteins in tobacco, tomato and Arabidopsis. The scale

indicates branch lengths. Accession numbers are as follows: TKN1 (Solyc04g077210.2), TKN2 (Solyc02g081120.2), NTH20 (BAA76904), BP (At4g08150), STM (At1g62360), NTH22 (BAA76905), NTH201 (BAF95776), KNAT2 (At1g70510), KNAT6 (At1g70510), KNAT5 (At4g32040), KNAT7 (At1g62990), KNAT4 (At5g11060), and KNAT3 (At5g25220), ATH1 (At4g32980).

(C) Tissue-specific expression of *NtBPL* in wild-type plants.

**Supplementary Fig. S4. Developmental-specific expression of *NtSVP* and *NtBPL* in pedicels of wild-type plants.**

**Supplementary Fig. S5. Phenotypes of the *NtBPL* transgenic plants.**

(A) The whole plant morphology of wild-type and *NtBPL* transgenic plants at the reproductive stage.

(B) Distribution of the angles between the pedicels and the inflorescences in WT, *NtBPL*-OE and *NtBPL*-RNAi plants. N= 10 X 5, 50 pedicels from five plants were measured as a replicate, and three replications were performed. Values are means  $\pm$  SE.

(C) Longitudinal sections of the pedicels of WT and *NtBPL* transgenic plants at anthesis stage. Asterisks pointed to cortex cells. Bars = 100  $\mu$ m.

(D) Cell numbers in the longitudinal cortex file of pedicels in WT and *NtBPL* transgenic plants at anthesis (N= 3 X 5, 15 sections from five individual plants per genotype were used). Values are means  $\pm$  SE.

(E) qRT-PCR detection of *NtSVP* expression in pedicels of WT and *NtBPL* transgenic plants. *NtACTIN9* was used as an internal control.

**Supplementary Fig. S6. The promoter sequence of *NtBPL*.** The CArG-box and initiation codon were highlighted by black boxes.

**Supplementary Fig. S7. Confirmation of microarray data.** Four differently expressed genes *NtGRAS1*, *NtEREBP5*, *NtWRKY3*, and *NtSBP2* were randomly selected for qRT-PCR detection compared with those of microarray results. *NtACTIN9* was used as an internal control.

**Supplementary Fig. S8. GO enrichment analysis of differentially expressed genes in *NtBPL*-RNAi pedicels and their MapMan classification.**

(A) Gene ontology analysis of 427 down-regulated genes in *NtBPL*-RNAi pedicels compared with those in the wild type. Colors indicate significance level of each over-represented terms (FDR  $\leq$  0.01).

(B) Gene ontology analysis of 230 up-regulated genes in *NtBPL*-RNAi pedicels compared with those in the wild type plant. Colors indicate significance level of each over-represented terms ( $FDR \leq 0.01$ ).

(C) MapMan classification of differentially expressed genes in *NtBPL*-RNAi pedicels.

**Supplementary Table S1. Hormone related genes that are differentially expressed due to down-regulation of *NtBPL*.**

**Supplementary Table S2. Primers used in this work.**

**Supplementary dataset 1. List of differentially expressed genes between the wild type and *NtBPL*-RNAi pedicels.**

Fig. S1

A

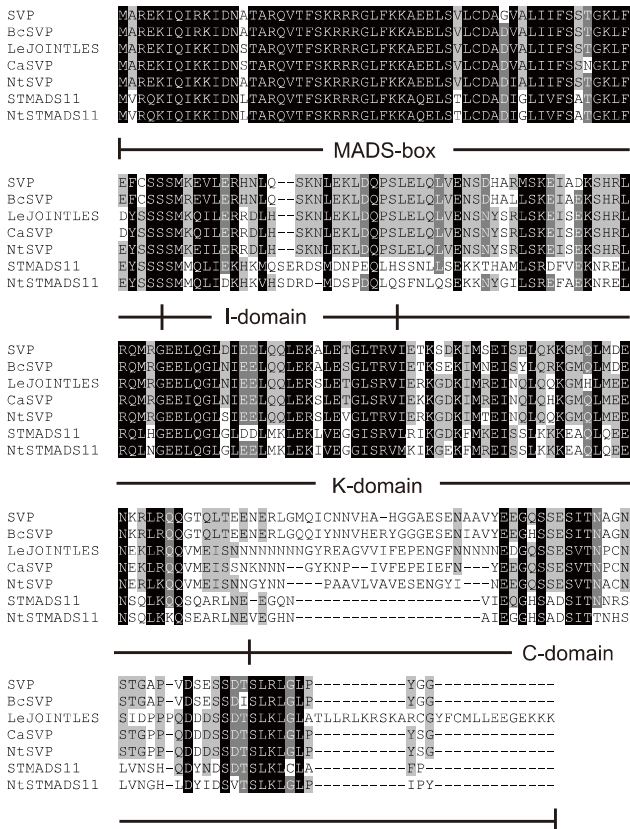

B

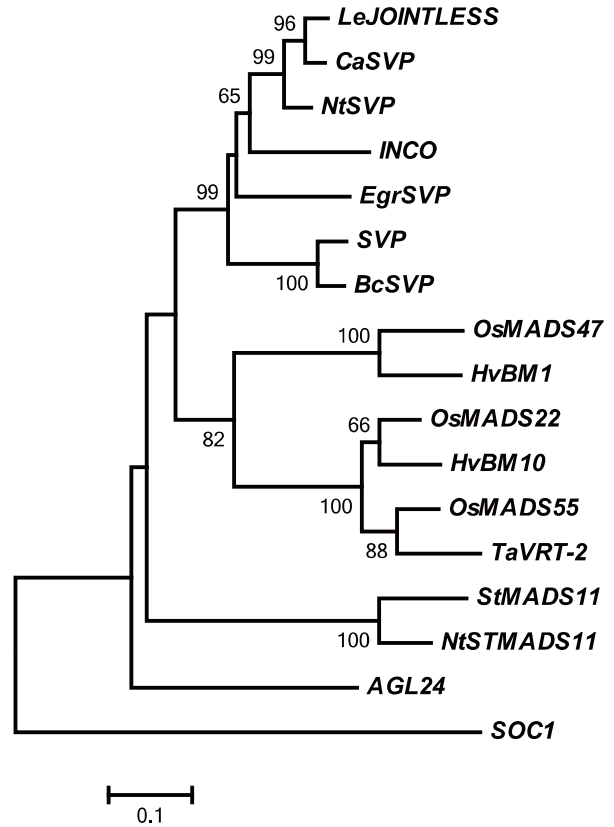

C

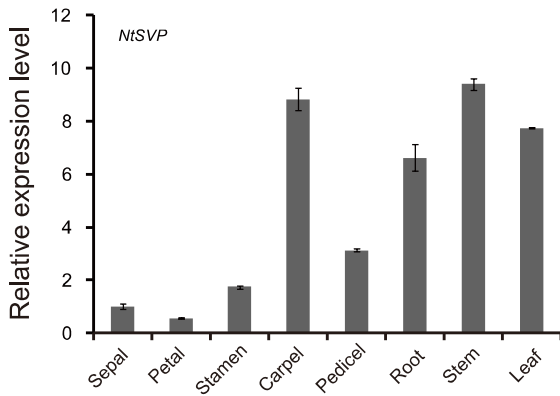

Fig. S2

A

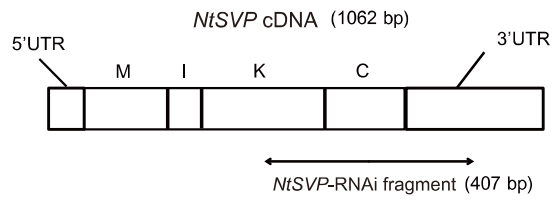

B

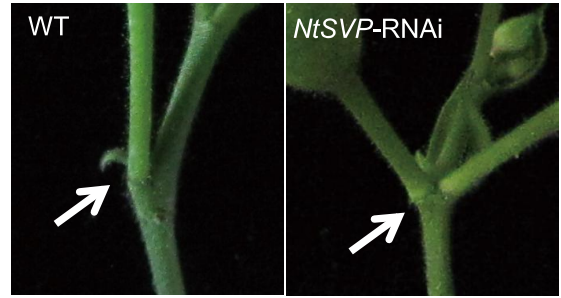

C

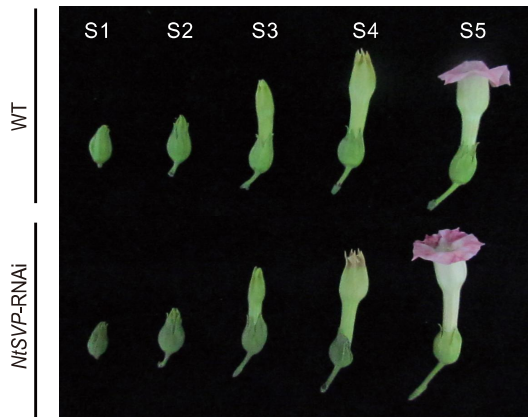

D

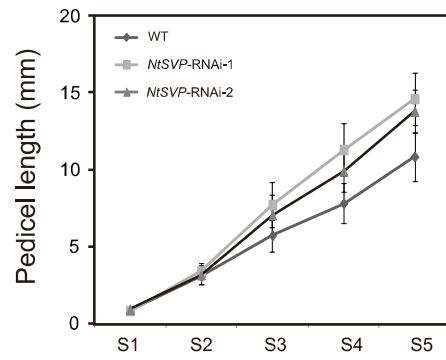

E

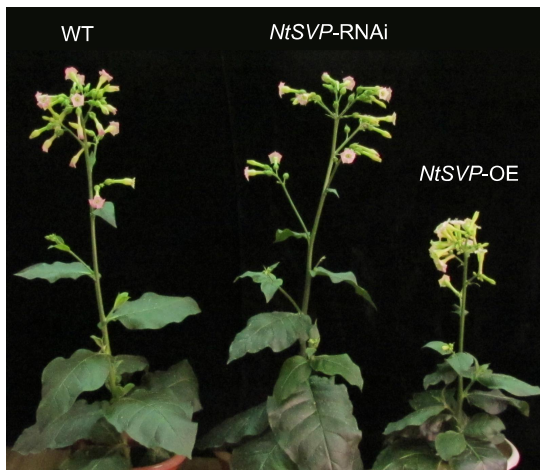

F

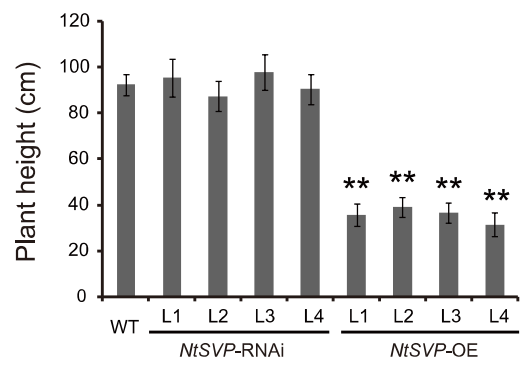

Fig. S3

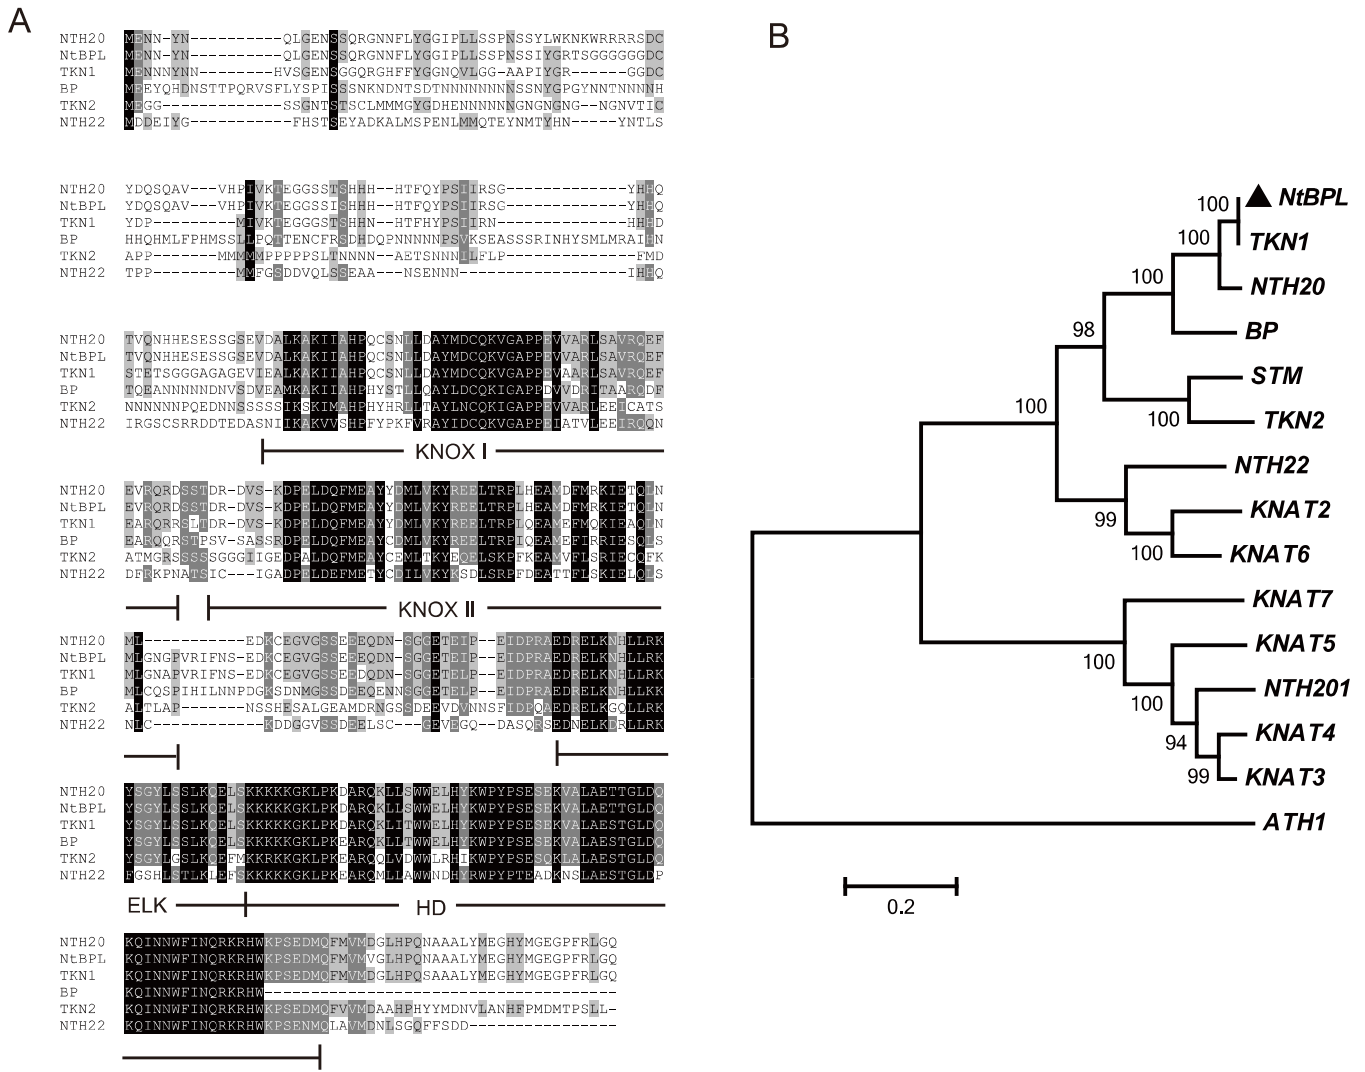

Fig. S4

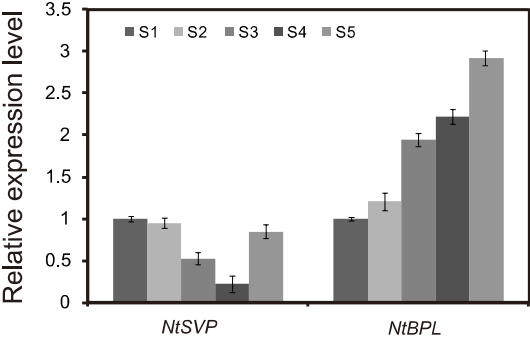



Fig. S5

A

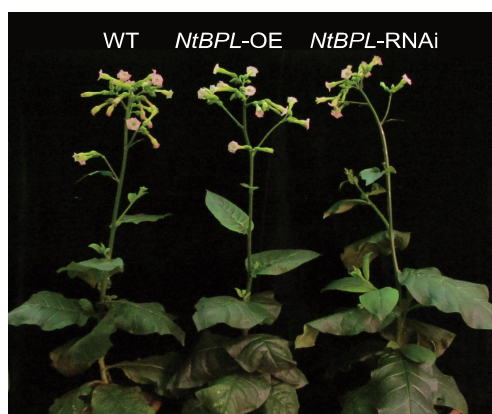

B

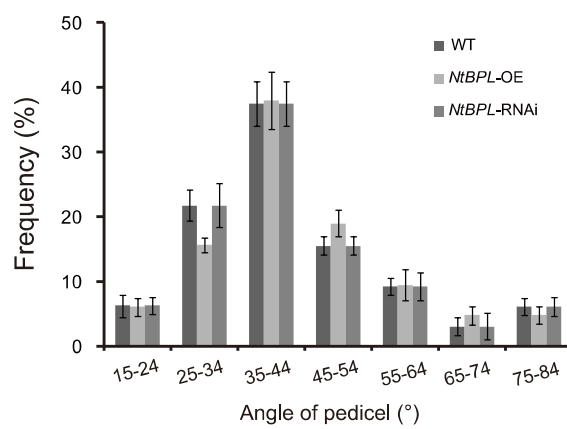

C

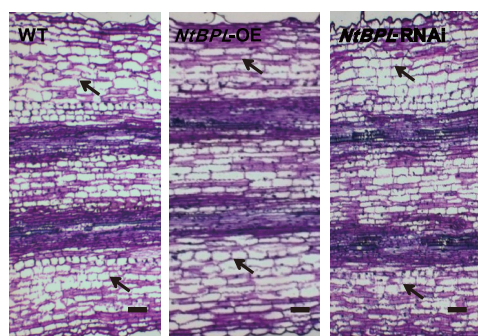

D

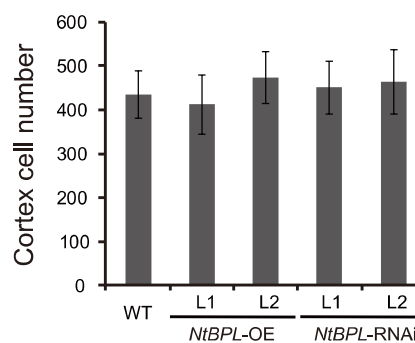

E

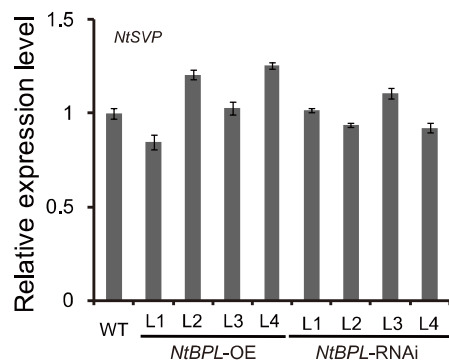

Fig. S6

GGCCTACTAA TAGGGGGCGA TTGAGCTGCC CTTAGCTTCG CTTCTTCTAT CAATTCCTTG  
CCATCATCCT CTTTGATAAT GTAAACAATT GAACCAATTT ATATAACTCA ATTTTTCTAT  
**CAATTATAAG** AACTAACTT TTCCAAGGTA GTGAAATAAA TAATCAATAG AAAAAGAAAG  
ACCTCACAAA AGGAAAAAGA AAATGAAAAG GGCTTCCCAT GGAAGTAATA GGAAAAGCAA  
CArG-box  
AAGAATACAA AAAGAAAGAG AAAGTTAAAA GATCTAACTA ACTAACTCTA TATATATACA  
TATATATATA TTGAATAAAA TAATTATGCT TTCTTTATAA TTGAGTGGTT TTCTCTGCAT  
AGGATTATAG GGGGTATAGT TAAACTAAAG ACTAATATTT TCCAATACAT TTCCTTATTC  
TTCAACGTAA GAACGTCTTG TCATCTACGA AGCCGCTACC AGGAGCGGCC ACTAGCTTAC  
CCCTTCCCTT CCTTTCCTTT CCTTTTTTCT TTGTTACAG CCACTATCTT CTATGTTGTC  
AAGATAAGTT CATTCAAAA CTTCTTCAGT ACAACTTCAT CTCCTTGCC TCCTTAACCA  
GACAACACTA GTAAAAATAT CCAATTATTA TTATTTTTTG TGTGTGTTT TTTTACCAA  
TAAAGAAGAG ATCTCGAAGA GTTAAATGAA CTTTCCCCCT ATAGTTGTGT TAGTTTGACG  
AATAATAAGT ATTCTAGACT TTGTTTAGGG TTTTATCTAG TTCTCAACTG TTTATCCACA  
TCTTTGATTT AGGGTTGCCG ATCTTCATAT ATTTTTTTTA CCATATCTTG TTAGGGTAAT  
TATCTAGAAA GGCAGCTTG GCGTAATCAT GGCATAGCT GTTTCCTGTG TGAATTGTTA  
TCCGCTCACA ATTCCACACA ACATACGAGC CGGAAGCATA AAGTGTAAG CCTGGGGTGC  
TAATGAGTGA GCTAACTCAC ATTATT**ATG** AGAATAATTA  
Initiation Codon

Fig. S7

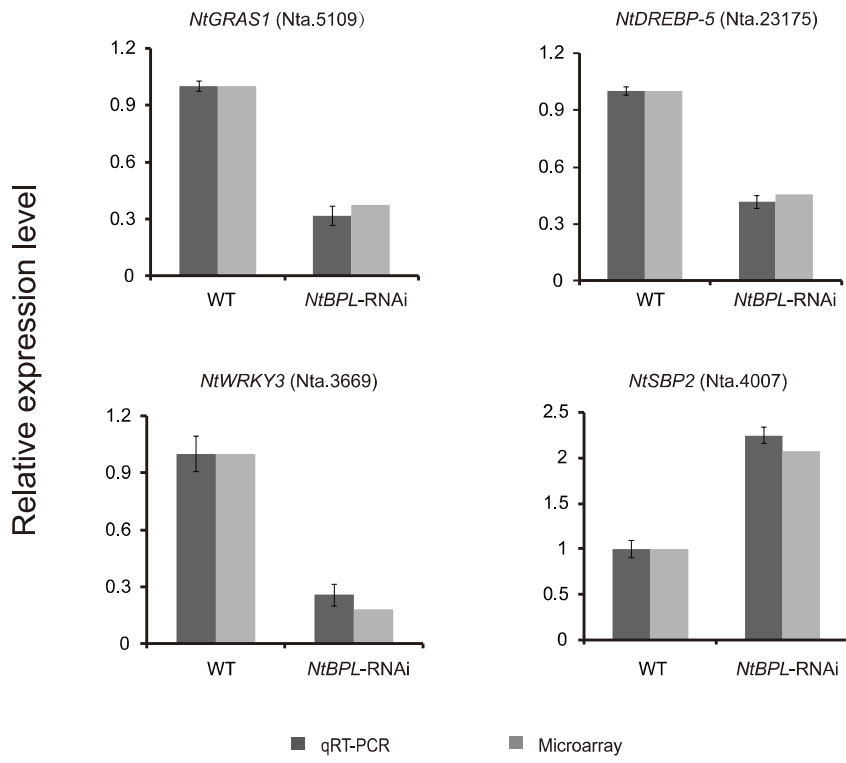

Fig. S8

A

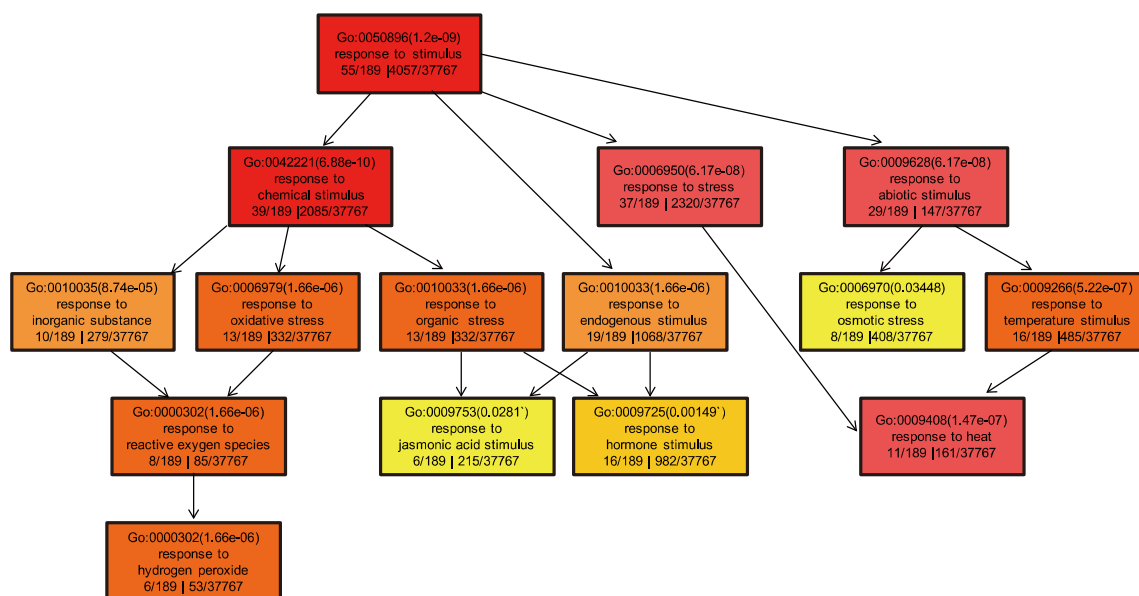

B

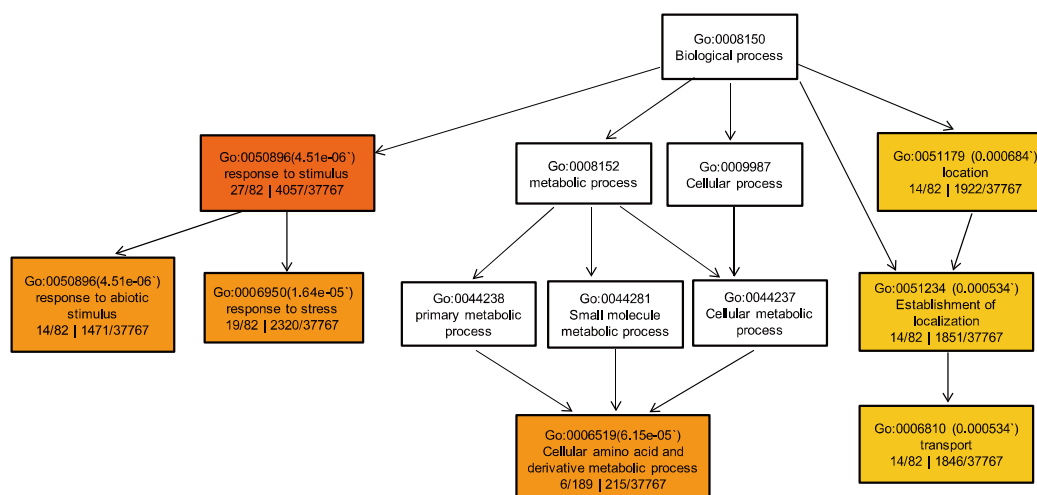

C

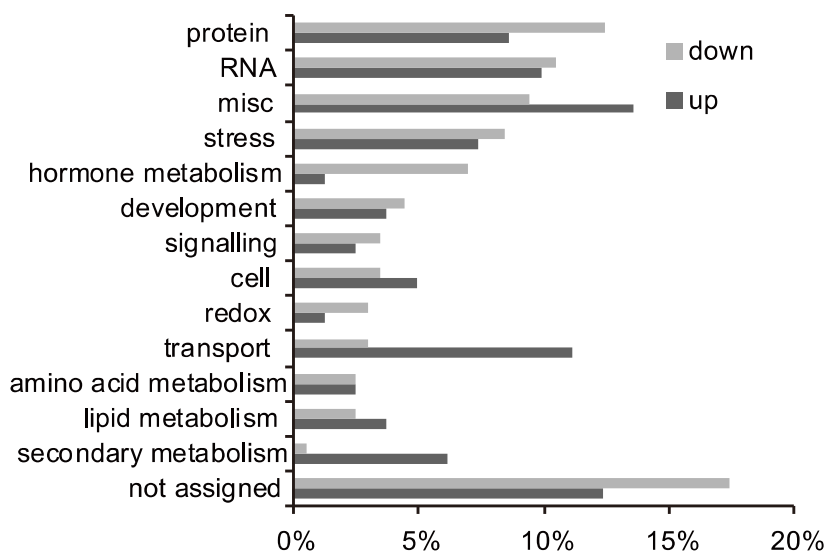

**Supplementary Table S1. Hormone related genes that are differentially expressed due to down-regulation of *NiBPL*.**

|                                                                            | Arabidopsis homologs | Description                           | Foldchange | UniGene ID |
|----------------------------------------------------------------------------|----------------------|---------------------------------------|------------|------------|
| <b><i>Up regulated</i></b>                                                 |                      |                                       |            |            |
| auxin.induced-regulated-responsive-activated                               | at5g54510            | GH3.6, DFL1   DFL1 (DWARF IN LIGHT 1) | 2.3        | Nta.23121  |
| gibberelin.induced-regulated-responsive-activated                          | at3g02885            | GASA5                                 | 6.01       | Nta.8147   |
| <b><i>Down regulated</i></b>                                               |                      |                                       |            |            |
| auxin.induced-regulated-responsive-activated                               | at2g45210            | Auxin-responsive protein-related      | 0.24       | Nta.3096   |
| auxin.induced-regulated-responsive-activated                               | at5g35735            | Auxin-responsive family protein       | 0.297      | Nta.8872   |
| auxin.induced-regulated-responsive-activated                               | at4g27450            | Unknown protein                       | 0.42       | Nta.801    |
| brassinosteroid.synthesis-degradation.BRs.metabolic regulation             | at2g26710            | BAS1, CYP734A1, CYP72B1               | 0.48       | Nta.15867  |
| ethylene.synthesis-degradation.1-amino cyclopropane-1-carboxylate synthase | at5g65800            | ACS5, CIN5, ETO2, ATACS5              | 0.35       | Nta.14789  |
| ethylene.synthesis-degradation.1-amino cyclopropane-1-carboxylate oxidase  | at2g19590            | ACO1                                  | 0.15       | Nta.12328  |
| gibberelin.synthesis-degradation.copalyl diphosphate synthase              | at4g02780            | GA1, ABC33, ATCPS1                    | 0.22       | Nta.4073   |
| gibberelin.synthesis-degradation.ent-kaurene synthase                      | at1g79460            | GA2, KS, ATKS                         | 0.38       | Nta.23734  |
| gibberelin.synthesis-degradation.ent-kaurenoic acid hydroxylase/oxygenase  | at1g05160            | CYP88A3, ATKA01, KAO1                 | 0.47       | Nta.4075   |
| gibberelin.synthesis-degradation.GA3 oxidase                               | at1g15550            | GA4, ATGA3OX1, GA3OX1                 | 0.33       | Nta.3870   |
| gibberelin.synthesis-degradation.GA3 oxidase                               | at1g80340            | GA4H, ATGA3OX2, GA3OX2                | 0.18       | Nta.9957   |
| gibberelin.induced-regulated-responsive-activated                          | at2g14900            | GASA7                                 | 0.23       | Nta.3268   |

**Supplementary Table S2. Primers used in this work**

Sequence (5'-3')

**For transgenic plants**

|                     |                              |
|---------------------|------------------------------|
| <i>NiSVP</i> RNAi-F | GTCATAGAGA GAAAG             |
| <i>NiSVP</i> RNAi-R | GCCAAACATG AATCTGA           |
| <i>NiSVP</i> OE-F   | CGATGAGCTCATGGCTAGAGAGAAAATT |
| <i>NiSVP</i> OE-R   | CGTAGGTACCTCAACCTGAGTAGGGCAG |

**For RACE**

|                      |                            |
|----------------------|----------------------------|
| <i>NiSVP</i> gstWR   | TTTCTCTATGACGCGGGTCAATCCAG |
| <i>NiSVP</i> -F1     | TCCAATAATGGATAACAACAACCCAG |
| <i>NiSVP</i> -F2     | GCAGCAGTATTAGTAGCAGTTGAAT  |
| Gene Racer 5' primer | CGACTGGAGCACGAGGACACTGA    |

**For TAIL-PCR**

|                   |                       |
|-------------------|-----------------------|
| <i>NiBPL</i> -SP1 | CCGCTTGTTCTCCATAAATAG |
| <i>NiBPL</i> -SP2 | TATGGGATGTACCACTGCTTG |
| <i>NiBPL</i> -SP3 | GATGAGTTCTCCCCAGTTGAT |

**For real-time PCR**

|                      |                            |
|----------------------|----------------------------|
| <i>NiACTIN9</i> -F   | CTATTCTCCGCTTTGGACTTGGCA   |
| <i>NiACTIN9</i> -R   | AGGACCTCAGGACAACGGAAACG    |
| <i>NiSVP</i> -F      | TGTGATGCTGATGTTGCTCTC      |
| <i>NiSTMADS11</i> -F | AGAGCTGCAAGGACTTGGCTT      |
| <i>NiSTMADS11</i> -R | TGATGGAGTCTGCGGAATGTC      |
| <i>NTH20</i> -Fw     | TACAATCAACTGGGGGAGAAC      |
| <i>NTH20</i> -Rv     | CTACGAATAATCGAAGGGTA       |
| <i>NTH22</i> -F      | AGTTTGGGAGTCACCTAAGTAC     |
| <i>NTH22</i> -R      | AGCTAACTGCATATTCTCTGAC     |
| <i>NiSVP</i> -R      | GTCTTTCTCCCCTCATTTGTC      |
| <i>NiBPL</i> -F      | AGCAGTGGTACATCCCATAGT      |
| <i>NiBPL</i> -R      | CTCACTTCAAACCTTGCCGT       |
| <i>NiCPS</i> -F      | TCAAAGAGAAGATGGATCTTGGG    |
| <i>NiCPS</i> -R      | AGGTGAAATCTGATCCTTGTATC    |
| <i>NiKS</i> -F       | GTCATGGGCCAAGAATGGTG       |
| <i>NiKS</i> -R       | CGCTGAAAATATGATGCCAC       |
| <i>NiKAO</i> -F      | TGGGGATGGTATAACCATTAATCAT  |
| <i>NiKAO</i> -R      | TGAATCTTCTGGTCATATTACATG   |
| <i>NiGA3ox1</i> -F   | GCCTTTTTTCGCTTCCAATGC      |
| <i>NiGA3ox1</i> -R   | GCTTTTCCATTTCCCTTTCGT      |
| <i>NiGA3ox2</i> -F   | GAGGAAGCTGGAAAACGACTT      |
| <i>NiGA3ox2</i> -R   | AGCATCAGCCACATCAGTCTT      |
| <i>NiAS1</i> -F      | AGAGGAGCAGCGTCTTGTAT       |
| <i>NiAS1</i> -R      | GACACTCCGCTCTTTCACAAT      |
| <i>NiAS2</i> -F      | TCTACCGTGGCTGATCCATAC      |
| <i>NiAS2</i> -R      | AGAAACCTCGAACCATCCTTG      |
| <i>NiER</i> -F       | AAACAGCTGGAACCTGTAAC       |
| <i>NiER</i> -R       | CGCACATCAAAAATACCACAGG     |
| <i>NiCRM</i> -F      | CTGTTTCAGGCTAATGTGGTAT     |
| <i>NiCRM</i> -R      | GGGATGATGGACAAAACAAGAG     |
| <i>NiYUCC5</i> -F    | AGTTTCTCAGATAACGATTTCTTTG  |
| <i>NiYUCC5</i> -R    | GTCTCTTTGTAGGGTACTCAGGGTAG |

**For yeast one hybrid**

|                 |                                                                    |
|-----------------|--------------------------------------------------------------------|
| <i>NiSVP</i> -F | <u>aagcagtgatcaacgcagagtgccattatgccccATGGCTAGAGAGAAAATTCAGATCA</u> |
| <i>NiSVP</i> -R | <u>AGATCTCCGGCTCCGCGGCTGTACACCTGAGTAGGGCAGCCCCAAGCTTG</u>          |
| CArG-box        | <u>GAGCTCGCAATTAAGACGCTATTAAGACGCTATTAAGACCTCGA</u>                |
| CArG-box(m)     | <u>GAGCTCGCAAGGAAAAGACGCTATTAAGACGCTATTAAGACCTCGA</u>              |

**Probes for EMSA**

|                         |                                            |
|-------------------------|--------------------------------------------|
| mu-pro <i>NiBPL</i> (+) | actcaatTTTTctatGGATGCATCCaaactaaactttcca   |
| mu-pro <i>NiBPL</i> (-) | TGGAAAAGTTAGTTTGGATGCATCCATAGAAAAATTGAGT   |
| wt-pro <i>NiBPL</i> (+) | ACTCAATTTT TCTATCAATT ATAAGAACT AACTTTTCCA |
| wt-pro <i>NiBPL</i> (-) | TGGAAAAGTTAGTTTCTTATAATTGATAGAAAAATTGAGT   |
| BamHI- <i>NiSVP</i> Fw  | CGAagatccATGGCTAGAGAGAAAATTCAG             |
| XhoI- <i>NiSVP</i> Rv   | CGCctcgagACCTGAGTAGGGCAGCCC                |

**For dual-luciferase assay**

|                                   |                                             |
|-----------------------------------|---------------------------------------------|
| <i>Sal</i> I-pro <i>NiBPL</i> -Fw | caGTCGACgcttegettctctatcaatc                |
| Bam HI-pro <i>NiBPL</i> -Rv       | cgGGATCCCTAATTACCCTAACAAGATATGGT            |
| m1CArG-R                          | TACCTTGAAAAGTTAGTTTATTATAATTATAGAAAAATTGAG  |
| m1CArG-F                          | ACTCAATTTTCTATAAATTATAATAAACTAACTTTTCCAAGGT |
| m2CArG-R                          | ACCTTGAAAAGTTAGTTTATTAGCATTTATAGAAAAATTGAGT |
| m2CArG-F                          | ACTCAATTTTCTATAAATGCTAATAAACTAACTTTTCCAAGGT |
